# Supplementary figures and images for: Determinants of Cell- and Gene-Specific Transcriptional Regulation by the Glucocorticoid Receptor
Source: PLOS journal article supplement (doi:10.1371/journal.pgen.0030094), 2007-06-04

**A**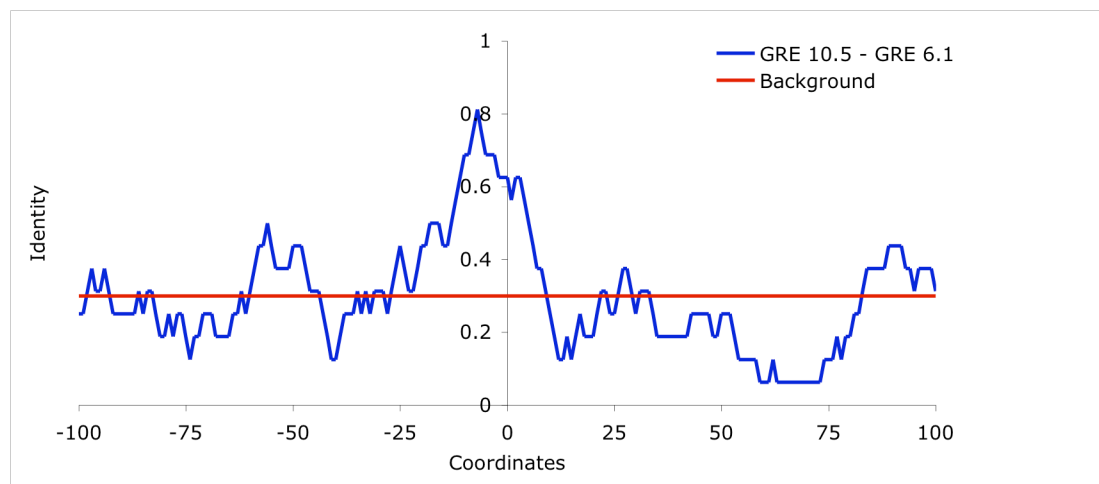**B**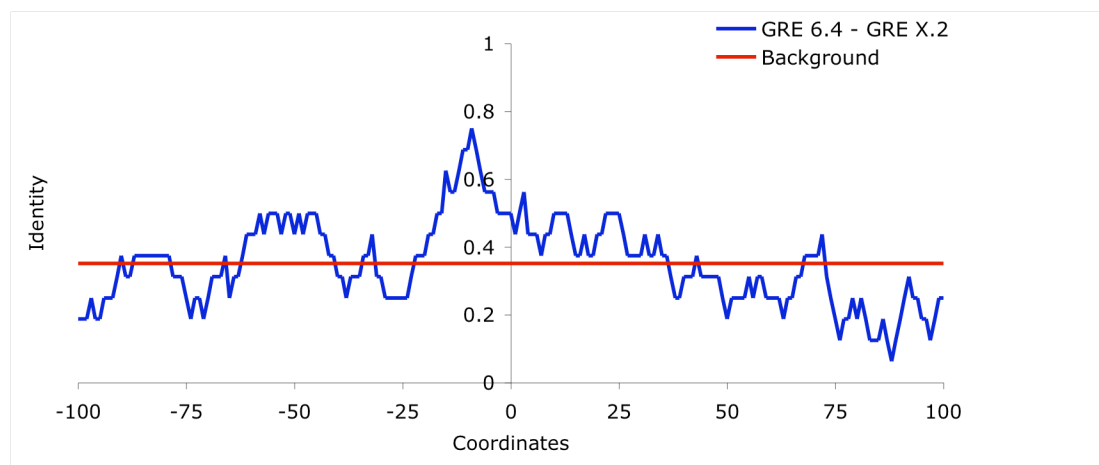**Supplemental Figure 4**

Supplement: S4 (10.1371/journal.pgen.0030094.s004) [file journal.pgen.0030094.s004]
